1 **Digital morphometry of tumor nuclei correlates to BAP-1 status, monosomy 3,**  
2 **gene expression class and survival in uveal melanoma**

3 Christina Herrspiegel<sup>1,2</sup>, Thonnie Rose O. See<sup>3</sup>, Pia R. Mendoza<sup>4</sup>, Hans E.

4 Grossniklaus<sup>3</sup>, and Gustav Stålhammar<sup>\*1,2</sup>

5 <sup>1</sup>St. Erik Eye Hospital, Stockholm, Sweden

6 <sup>2</sup>Department of Clinical Neuroscience, Karolinska Institutet, Stockholm, Sweden, and

7 <sup>3</sup>Departments of Ophthalmology and Pathology, Emory University School of  
8 Medicine, Atlanta, Georgia, USA.

9 <sup>4</sup>Department of Pathology and Laboratory Medicine, Emory University School of  
10 Medicine, Atlanta, Georgia, USA.

11

12 \*Corresponding author

13 Gustav Stålhammar, M.D. Ph.D. FEBO

14 Oncology and Pathology service, St. Erik Eye Hospital

15 Department of Clinical Neuroscience, Karolinska Institutet

16 Polhemsgatan 50, 112 82

17 Stockholm, Sweden

18 Email: [gustav.stalhammar@ki.se](mailto:gustav.stalhammar@ki.se)

19 Phone: +46 8 672 30 00

20

21 **ABSTRACT**

22 Cytologic features such as the shape and size of tumor cells can predict metastatic  
23 death in uveal melanoma and other cancers but suffer from poor reproducibility. In  
24 this study, we investigate the interobserver concordance of digital morphometry, and  
25 correlate the results with BRCA associated protein-1 (BAP-1) expression and *BAP-1*  
26 gene mutation status, monosomy 3, gene expression classifications and patient  
27 survival in uveal melanoma. The average number of cells analyzed in each of 107  
28 tumors, was 1957 (SD 349). Mean time consumption was less than 2.5 minutes per  
29 tumor. Identical morphometric classification was obtained for  $\geq 85$  % of tumors in all  
30 twelve evaluated morphometric variables ( $\kappa$  0.70–0.93). The mean nucleus area,  
31 nucleus perimeter, nucleus max caliper and nucleus to cell area ratio were  
32 significantly greater in tumors with low BAP-1 expression and gene expression class  
33 2. Patients had significantly shorter survival if their tumors had low BAP-1 (Log-  
34 Rank  $p=0.002$ ), gene expression class 2 ( $p=0.004$ ), long nucleus perimeters  
35 ( $p=0.031$ ), long nucleus max calipers ( $p=0.029$ ) and high mean nucleus to cell area  
36 ratios ( $p=0.041$ ) as defined in a training cohort and then tested in a validation cohort.  
37 In the validation cohort, long nucleus perimeters and long nucleus max calipers  
38 correlated with monosomy 3 (Pearson Chi-Square  $p=0.006$  and  $p=0.009$ ,  
39 respectively). Long nucleus perimeters also correlated with *BAP-1* mutation  
40 ( $p=0.017$ ). We conclude that digital morphometry can be fast and highly reproducible,  
41 that for the first time, morphometry parameters can be objectively quantitated in  
42 thousands of cells at a time in sub- $\mu\text{m}$  resolutions, and that variables describing the  
43 shape and size tumor nuclei correlate to BAP-1 status, monosomy 3, gene expression  
44 class as well as patient survival.

## 45 **1. Introduction**

46 Uveal melanoma is the most common primary intraocular malignancy in adults  
47 (Singh *et al.*, 2014). Less than 5 % of patients have clinically detectable metastases at  
48 the time of diagnosis (Singh *et al.*, 2014). At a later stage however, up to 45 % of  
49 patients will develop metastases even if the eye containing the tumor has been  
50 removed (Kujala, Mäkitie and Kivelä, 2003). Once macrometastases develop, there is  
51 no effective treatment and median patient survival is only 4-12 months (Carvajal *et*  
52 *al.*, 2016; Augsburger, Corrêa and Shaikh, 2009).

53 Several methods for prognostication are in clinical use. Tumor thickness,  
54 diameter, location in the eye and presence of distant metastases determine tumor stage  
55 (Kivelä *et al.*, 2017; Arnljots *et al.*, 2018). Loss of chromosome 3 has a high positive  
56 and negative predictive value for metastasis (Bornfeld *et al.*, 1996). Commercial gene  
57 tests based on the expression of 12 classifier genes have been developed and show  
58 excellent prognostic utility in separation of class 1 tumors with low metastatic risk  
59 from class 2 tumors with high metastatic risk (Onken *et al.*, 2012). Furthermore, we  
60 have previously shown the prognostic utility of manual (Szalai *et al.*, 2018) and  
61 digital image analysis-based (Stålhammar *et al.*, 2019a) determination of the level of  
62 nuclear BAP-1 (nBAP-1) expression.

63 In 1931, Callender described six types of uveal melanoma based on cytologic  
64 features such as cell shape and the size of the nucleus (Callender, 1931). The original  
65 classification could accurately predict metastatic death, but suffered from substantial  
66 intra- and interobserver discordance (Gamel, McCurdy and McLean, 1992; Coleman  
67 *et al.*, 1996). After several modifications, the morphological classification of uveal  
68 melanoma now rely on assessments of the proportion of epitheloid tumor cells

69 (McLean *et al.*, 1983; Seddon *et al.*, 1987). Examination of cytological features still  
70 require a high level of cytologic expertise and suffer from poor reproducibility  
71 (Gamel, McCurdy and McLean, 1992). Computer-assisted methods have therefore  
72 been proposed as a way of facilitating these assessments. In 1982, Gamel *et al.* found  
73 that 13 of 18 nuclear and nucleolar features correlated significantly with patient  
74 mortality when evaluated with a digitizer superimposed on microscopic images at a  
75 rate of 100 cells per hour (Gamel *et al.*, 1982). Since then, computers have improved  
76 manifold in terms of their computing power, cost and the number and scope of  
77 software applications and we can now analyze a dozen of variables or more in  
78 thousands of cells per minute on inexpensive off-the-shelf laptop computers  
79 (Stålhammar *et al.*, 2018; Stålhammar *et al.*, 2016).

80           Consequently, we see an opportunity to analyze cell morphometry features  
81 with digital image analysis and compare these to other prognostic factors including  
82 nBAP-1 expression in uveal melanoma patients from one American and one European  
83 referral center.

84

## 85 **2. Methods**

### 86 *2.1. Patients and Samples*

87 The study adhered to the tenets of the Declaration of Helsinki. Methods were carried  
88 out in accordance with the relevant guidelines and regulations. The protocol for  
89 collection of specimens and data from St. Erik Eye Hospital, Stockholm, Sweden was  
90 approved by the regional ethical review board in Stockholm, and the protocol for  
91 collection of specimens and data from Emory Eye Center, Atlanta, GA, USA by the  
92 Emory Institutional Review Board.

93 Patients in the training cohort ( $n=27$ ) were identified in the archives of the  
94 Oncology and Pathology service, St. Erik Eye Hospital and L.F. Montgomery  
95 Ophthalmic Pathology Laboratory, Emory Eye Center. Inclusion criteria were: 1)  
96 Enucleation performed before December 2017, 2) Histologically proven uveal  
97 melanoma, 3) paraffin block available, 4) gene expression classification available, 5)  
98 clinicopathological data available, including tumor thickness, diameter, location, T-  
99 category and cell type, 6) follow-up data available, 7) sufficient tissue for BAP-1  
100 immunohistochemistry. Exclusion criteria were: 1) Prior history of plaque  
101 brachytherapy, proton beam irradiation and/or transpupillary thermotherapy (TTT),  
102 and 3) tumor fully necrotic or fully hemorrhagic. 27 patients met the criteria. Our  
103 follow-up data was confirmed and further extended in telephone interviews with  
104 patients or relatives. Informed consent was obtained from all participants.

105 In order to establish generalizable morphometry thresholds for prediction of  
106 prognosis, we also included patients from the Cancer Genome Atlas (TCGA), made  
107 available by the National Cancer Institute at the National Institutes of Health ( $n=80$ ).  
108 These patients had undergone enucleation due to primary uveal melanoma from 2011  
109 through 2013, without previous brachytherapy, proton beam irradiation or TTT.  
110 Digitally scanned diagnostic slides were downloaded along with data on overall  
111 survival from TCGA on which the thresholds established in the training cohort were  
112 tested. *BAP-1* mutation and monosomy 3 status was downloaded from the  
113 supplemental information to the publication by Robertson *et al* (Robertson *et al.*,  
114 2017). No protected health information was accessed or downloaded from TCGA.

115

116 *2.2. Immunohistochemistry*

117 The paraffin blocks were cut into 4  $\mu\text{m}$  sections, pretreated in EDTA-buffer at pH 9.0  
118 for 20 minutes and incubated with mouse monoclonal antibodies against BAP-1  
119 (clone C-4, Santa Cruz Biotechnology, Dallas, Texas, USA) and a red chromogen,  
120 and finally counterstained with haematoxylin and rinsed with deionized water. The  
121 deparaffinization, pretreatment, primary staining, secondary staining and  
122 counterstaining steps were run in a Bond III automated IHC/ISH stainer (Leica,  
123 Wetzlar, Germany). Dilutions between 1:20 and 1:500 had been evaluated before  
124 selecting 1:40.

125

### 126 *2.3. Digital image analysis*

127 After sectioning and staining, all glass slides were digitally scanned to the .ndpi file  
128 format at  $\times 400$ , using identical digital scanners at both institutions (Nano Zoomer 2.0  
129 HT, Hamamatsu Photonics K.K., Hamamatsu, Japan). The digital image analysis  
130 (DIA) software used was the QuPath Bioimage analysis v. 0.2.0 m4 (Bankhead *et al.*,  
131 2017). The software was run on a standard off-the-shelf laptop computer (Apple Inc.  
132 Cupertino, CA).

133 For assessment of the level of nBAP-1 expression, one positive cell (red  
134 chromogen in nucleus) and one negative cell (haematoxylin but no red chromogen in  
135 nucleus) was calibrated in each digitally scanned tissue section. All other parameters  
136 were left at default in order to limit time consumption and maintain ease of use.  
137 Tumors were then screened under low magnification ( $40\times$ ) and the area exhibiting the  
138 most intense nBAP-1 staining selected for grading. Nuclear immunoreactivity was  
139 evaluated at  $200\times$ , in a circular 0.5 mm-diameter region of interest (corresponding to  
140 the field of view in a light microscope with a  $400\times$  objective) by automatic

141 classification (positive cell detection). Based on previous publications, the nBAP-1  
142 expression was classified as “high” if immunoreactivity was detected in >30 % of  
143 tumor cells within the region of interest, and “low” if it was detected in  $\leq 30$  % of  
144 tumor cells (Stålhammar *et al.*, 2019a; Szalai *et al.*, 2018; See *et al.*, 2019).

145 A workflow for morphometric analysis was then created, including the  
146 following steps for each tumor: A) Identification of all cells within the same circular  
147 0.5 mm-diameter region of interest used for assessment of the level of nBAP-1  
148 expression, using the software’s cell detection function with the following settings:  
149 Background nucleus radius 8  $\mu\text{m}$ , median filter radius 0  $\mu\text{m}$ , sigma 1.5  $\mu\text{m}$ , minimum  
150 nucleus area 7.5  $\mu\text{m}^2$ , maximum nucleus area 200  $\mu\text{m}^2$ , threshold 0.1, max  
151 background intensity 2 and cell expansion 5  $\mu\text{m}$ . B) Measurement in each detected  
152 cell in each region of interest of the following 12 cell morphometric variables: 1)  
153 Nucleus area ( $\mu\text{m}^2$ ). 2) Nucleus perimeter ( $\mu\text{m}$ ). 3) Nucleus circularity. 4) Nucleus  
154 max caliper ( $\mu\text{m}$ ). 5) Nucleus min caliper ( $\mu\text{m}$ ). 6) Nucleus eccentricity. 7) Cell area  
155 ( $\mu\text{m}^2$ ). 8) Cell perimeter ( $\mu\text{m}$ ). 9) Cell circularity. 10) Cell max caliper. 11) Cell min  
156 caliper. 12) Nucleus to cell area ratio (figure 1).

157 Tumor areas with intense inflammation, heavy pigmentation, bleeding,  
158 necrosis or poor fixation were avoided. nBAP-1 classification and morphometric  
159 analysis was performed blinded to all other patient data including outcome. For  
160 measurement of interobserver concordance, two human observers performed the  
161 digital morphometry (morphometric variable above or below median value) and  
162 nBAP-1 classification (high or low) independently and blinded to patient outcomes.

163

164 *2.4. Gene expression classification*

165 Tumor tissue samples were obtained from freshly enucleated eyes by fine needle  
166 aspiration. The contents of the needle hub were transferred into one of two RNase-  
167 free cryovials. Using the same needle, extraction buffer from the second cryovial was  
168 aspirated and expelled into the first. This was then placed in a specimen bag,  
169 immediately frozen to -80° C and shipped on dry ice for gene expression classification  
170 based on 12 discriminating genes (*HTR2B*, *ECM1*, *RAB31*, *CDH1*, *FXR1*, *LTA4H*,  
171 *EIF1B*, *ID2*, *ROBO1*, *LMCD1*, *SATB1*, and *MTUS1*) and 3 control genes (*MRPS21*,  
172 *RBM23*, and *SAPI30*) at a commercial laboratory (Castle Biosciences Inc.  
173 Friendswood, TX, USA). Expression levels of the gene products are used to  
174 categorize tumors as either class 1 with low metastatic risk, or class 2 with high  
175 metastatic risk (Onken *et al.*, 2012).

176

### 177 2.5. Statistical methods

178 Differences with a  $p < 0.05$  were considered significant, all p-values being two-sided.  
179 The deviation of all clinicopathological variables from normal distribution was  
180 statistically significant, when evaluated by the Shapiro–Wilk test ( $p < 0.05$ ). For  
181 statistical tests of these variables, we therefore used the Mann-Whitney *U* test, which  
182 does not assume normally distributed data. The deviation of all morphometric  
183 variables from normal distribution was however not statistically significant ( $p > 0.05$ ),  
184 why we used one-way ANOVA with Bonferroni correction for these. For  
185 comparisons of categorical variables, two-by-two tables and Fisher’s exact test were  
186 used. For correlation to Cox Proportional Hazards for metastasis and Kaplan-Meier  
187 metastasis-free survival, patients were split into two groups based on 1) the median  
188 value of each morphometric variable, and 2) receiver operating characteristics (ROC)



189 in the training cohort, with equal emphasis on sensitivity and specificity for the  
190 development of metastasis. The thresholds established in the training cohort were then  
191 tested in the validation cohort, with Kaplan-Meier survival analysis and in two-by-  
192 two tables for Pearson Chi-Square correlation with *BAP-1* mutation and monosomy 3.  
193 In evaluation of interobserver concordance, the percentage of identically classified  
194 cases and Cohen's kappa statistics ( $\kappa$ ) were computed (Cohen, 1960). Metastasis-free  
195 follow-up was defined as the time in months from enucleation to the last occasion  
196 patients without metastases was seen or in contact alive. All statistical analyses were  
197 performed using IBM SPSS statistics version 25 (Armonk, NY, USA).

198

### 199 **3. Results**

#### 200 *3.1. Descriptive statistics*

201 The mean age at enucleation of patients in our training cohort was 66 years (SD 15).  
202 Of 27 patients, 15 were men and 12 women. 25 tumors originated in the choroid and 2  
203 in the ciliary body. The cell type was mixed in 18 patients, spindle in 5 and epitheloid  
204 in 4. Mean tumor thickness was 8.6 mm (SD 3.7) and mean diameter 15.8 mm (SD  
205 4.8). 12 tumors were of gene expression class 2 and 15 of class 1a or 1b. 14 tumors  
206 had low nBAP-1 expression and 13 high. Mean metastasis-free follow-up time was 47  
207 months (SD 76). The validation cohort had similar features (Table 1).

208 The average number of cells analyzed in each tumor was 1957 (SD 349),  
209 which took an average of 74 seconds (SD 21) for nBAP-1 classification and 71  
210 seconds (SD 17) for morphometric analysis, adding up to 145 seconds or nearly two-  
211 and-a-half minutes per tumor.

212

213 *3.2. Interobserver concordance*

214 Identical nBAP-1 classification was obtained for 25 of 27 tumors (93 %) in the  
215 training cohort, yielding a Cohen's kappa statistic indicating almost perfect agreement  
216 ( $\kappa=0.85$ ).

217 Identical morphometric classification (morphometric variable above/below  
218 median value) was obtained for  $\geq 85$  % of tumors in all 12 variables, yielding  
219 substantial or almost perfect agreement ( $\kappa$  0.70–0.93, Table 2).

220

221 *3.3. Morphometry versus nBAP-1 expression and gene expression class*

222 The mean nucleus area, nucleus perimeter, nucleus max caliper and nucleus to cell  
223 area ratio were significantly greater in tumors with low nBAP-1 expression. Nucleus  
224 circularity, nucleus min caliper, nucleus eccentricity and cell area, cell perimeter, cell  
225 circularity, cell max and min caliper were however not significantly different (Table  
226 3a).

227 Similarly, the nucleus to cell area ratio, but not the other morphometric  
228 variables, were significantly greater in tumors of gene expression class 2 (Table 3b).

229

230 *3.4. Adjusted thresholds*

231 The mean nucleus area, nucleus perimeter, nucleus max caliper and nucleus to cell  
232 area ratio were analyzed with ROC, with equal emphasis on sensitivity and specificity  
233 for the development of metastasis. Mean nucleus area achieved an area under the  
234 curve (AUC) of 0.54 (sensitivity 67 %, specificity 50 %,  $p=0.76$ ) at threshold  $28 \mu\text{m}^2$ ;  
235 Mean nucleus perimeter achieved an AUC of 0.58 (sensitivity 67 %, specificity 56 %,  $p=0.50$ ) at threshold  $22 \mu\text{m}$ ; Mean nucleus max caliper achieved an AUC of 0.61

236

237 (sensitivity 56 %, specificity 67 %,  $p=0.38$ ) at threshold 8.2  $\mu\text{m}$ ; and mean nucleus to  
238 cell area ratio achieved an AUC of 0.69 (sensitivity 56 %, specificity 67 %,  $p$   
239 asymptotic significance  $p=0.12$ ) at threshold 0.32 (figure 2).

240

### 241 3.5. Regression analysis and survival

242 In survival analysis, the thresholds defined in our training cohort was applied to  
243 morphometry measurements in the validation cohort. Kaplan-Meier overall survival  
244 was significantly shorter for patients with tumors that had long nucleus perimeters  
245 (Log-Rank  $p=0.031$ ), long nucleus max calipers (Log-Rank  $p=0.029$ ) and high mean  
246 nucleus to cell area ratios (Log-Rank  $p=0.041$ ). Patients also had significantly shorter  
247 survival if their tumors had low nBAP-1 expression (Log-Rank  $p=0.002$ ) or gene  
248 expression class 2 (Log-Rank  $p=0.004$ ). The nucleus area was however not associated  
249 with shortened survival (Log-Rank  $p=0.266$ , figure 3).

250 In univariate Cox proportional hazards analyses of nucleus area, nucleus  
251 perimeter, nucleus max caliper and nucleus to cell area ratio, all variables were  
252 individual predictors of metastasis. In multivariate analysis, nucleus perimeter and  
253 nucleus to cell area ratio retained their significance (Table 4).

254 In two-by-two tables, long nucleus perimeters correlated with *BAP-1* mutation  
255 and monosomy 3 (Pearson Chi-Square  $p=0.017$  and  $p=0.006$ , respectively). Long  
256 nucleus max calipers correlated with monosomy 3 ( $p=0.009$ ) but not with *BAP-1*  
257 mutation ( $p=0.085$ ). Nucleus area and nucleus to cell area ratio did not correlate with  
258 *BAP-1* mutation or monosomy 3 ( $p>0.21$ ).

259

## 260 4. Discussion

261 In this study, we have shown that digital morphometry of uveal melanoma can be fast  
262 and highly reproducible, and that variables describing the size of the tumor cell nuclei  
263 correlate to gene expression class, *BAP-1* status, monosomy 3 and patient survival.  
264 On the other hand, no variable describing the shape and size of the entire tumor cell  
265 correlated to the prognostic factors, indicating that for prognosis, the morphological  
266 characteristics of tumor nuclei are more important.

267 The prognostic importance of cell morphology is by no means a novel  
268 discovery or limited to uveal melanoma. Deregulations in cell signaling leading to  
269 increases in cell size has been described as one of the hallmarks of cancer (Hanahan  
270 and Weinberg, 2011). However, such increases in cell size have been hard to measure  
271 until now and issues with reproducibility, time consumption and level of expertise  
272 required for reliable assessments have limited its utility both in research and clinic.  
273 Modern user-friendly digital image analysis techniques offer an attractive solution to  
274 these problems, and for the first time we can now objectively quantitate multiple  
275 morphometry parameters in thousands of cells at a time.

276 In turn, changes to the size and shape of tumor cells are but a consequence of  
277 changes in the genotype, epigenetics and environmental factors. These changes can be  
278 tested with alternative methods, such as gene expression tests, next generation  
279 sequencing and chromosome analysis (Robertson *et al.*, 2017; Onken *et al.*, 2012). As  
280 found by Onken *et al.* the helix-loop-helix inhibitor *ID2* suppress the epithelial  
281 phenotype associated with an enlarged nucleus (Onken *et al.*, 2006). Loss of *ID2* up-  
282 regulates the epithelial adhesion molecule E-cadherin, which in turn promotes the  
283 anchorage-independent cell growth required for metastasis. Consequently, we regard

284 the morphometric characteristics investigated here as biomarkers, primarily for the  
285 cancer genotype.

286           Limitations of this study include a limited sample size. Substantial  
287 investments in digital scanning capacity is required before the method presented here  
288 can be used. The time consumption specified does not include preanalytical  
289 operations such as digital scanning and loading and unloading of glass slides. Small  
290 changes in the settings of the software's cell detection function will influence the  
291 results greatly and even though measurements are automatized and the interobserver  
292 concordance is almost perfect as shown here, the definition of representative regions  
293 of interest requires at least a basic experience in ophthalmic pathology. This may  
294 reduce the generalizability of our method, the number of potential users and its  
295 application in everyday clinical routine. Further, as only one region of interest per  
296 tumor is defined, intratumor heterogeneity is not taken into account. As we have  
297 shown previously, there is significant variation in tumor characteristics including  
298 nBAP-1 expression in different subregions of UM (Stålhammar *et al.*, 2019b). Last,  
299 our sample is not representative of all patients with uveal melanoma. We have only  
300 investigated the feasibility of digital morphometry in enucleated specimens without  
301 previous plaque brachytherapy. A large proportion of patients with uveal melanoma  
302 undergo primary plaque brachytherapy or proton beam radiotherapy and may never  
303 require enucleation. It remains unclear if the digital morphometry characteristics of  
304 small uveal melanomas is different from the relatively large tumors investigated here.  
305 Accordingly, we encourage future studies to confirm these results in larger cohorts  
306 that includes smaller tumors.

307

308 **Funding**

309 This work was supported in part by Karolinska Institutet (Karolinska Institutets  
310 stiftelsemedel för ögonforskning), the Swedish Society of Medicine (Cronqvists  
311 stiftelse) and Stockholm County Council (Stockholms läns landsting).

312

313 **Acknowledgement**

314 The results published here are in part based upon data generated by the TCGA  
315 Research Network: <https://www.cancer.gov/tcga>.

316

317 **References**

- 318 Arnljots, T. S., Al-Sharbaty, Z., Lardner, E., All-Eriksson, C., Seregard, S.,  
319 Stålhammar, G. 2018., Tumour thickness, diameter, area or volume? The prognostic  
320 significance of conventional versus digital image analysis-based size estimation  
321 methods in uveal melanoma. *Acta Ophthalmol*, 965, 510-518. DOI:  
322 [10.1111/aos.13668](https://doi.org/10.1111/aos.13668)  
323  
324 Augsburger, J. J., Corrêa, Z. M., Shaikh, A. H., 2009. Effectiveness of Treatments for  
325 Metastatic Uveal Melanoma. *Am J Ophthalmol*, 1481, 119-127. DOI:  
326 [10.1016/j.ajo.2009.01.023](https://doi.org/10.1016/j.ajo.2009.01.023)  
327  
328 Bankhead, P., Loughrey, M., Fernández, J., Dombrowski, Y., McArt, D., Dunne, P.,  
329 McQuaid, S., Gray, R., Murray, L., Coleman, H., James, J., Salto-Tellez, M.,  
330 Hamilton, P., 2017. QuPath: Open source software for digital pathology image  
331 analysis. *Sci Rep*, 71, 16878-16878. DOI: [10.1038/s41598-017-17204-5](https://doi.org/10.1038/s41598-017-17204-5)  
332  
333 Bornfeld, N., Prescher, G., Becher, R., Hirche, H., Jöckel, K. H., Horsthemke, B.,  
334 1996. Prognostic implications of monosomy 3 in uveal melanoma. *The Lancet*,  
335 3479010, 1222-1225. DOI: [10.1016/s0140-6736\(96\)90736-9](https://doi.org/10.1016/s0140-6736(96)90736-9)  
336  
337 Callender, G., 1931. Malignant Melanotic tumors of the eye. A study of histologic  
338 types in 111 cases. *Trans. Am. Acad. Ophthalmol. Otolaryngol.* 36, 131-142.  
339  
340 Carvajal, R. D., Schwartz, G. K., Tezel, T., Marr, B., Francis, J. H., Nathan, P. D.,  
341 2016. Metastatic disease from uveal melanoma: treatment options and future  
342 prospects. *Br J Ophthalmol*, 101, 38-44. DOI: [10.1136/bjophthalmol-2016-309034](https://doi.org/10.1136/bjophthalmol-2016-309034)  
343

- 344 Cohen, J., 1960. A Coefficient of Agreement for Nominal Scales. Educational and  
345 Psychological Measurement, 201, 37-46.  
346
- 347 Coleman, K., Baak, J. P. A., van Diest, P. J., Mullaney, J., 1996. Prognostic Value of  
348 Morphometric Features and the Callender Classification in Uveal Melanomas.  
349 Ophthalmol, 10310, 1634-1641. DOI: [10.1016/s0161-6420\(96\)30452-1](https://doi.org/10.1016/s0161-6420(96)30452-1)  
350
- 351 Gamel, J. W., McCurdy, J. B. and McLean, I. W., 1992. A comparison of prognostic  
352 covariates for uveal melanoma. Invest Ophthalmol Vis Sci, 336, 1919-1922.  
353
- 354 Gamel, J. W., McLean, I. W., Greenberg, R. A., Zimmerman, L. E., Lichtenstein, S.  
355 J., 1982. Computerized histologic assessment of malignant potential: A method for  
356 determining the prognosis of uveal melanomas. Hum Pathol. 1310, 893-897. DOI:  
357 [10.1016/s0046-8177\(82\)80048-8](https://doi.org/10.1016/s0046-8177(82)80048-8)  
358
- 359 Hanahan, D., Weinberg, R., 2011. Hallmarks of Cancer: The Next Generation. Cell,  
360 1445, 646-674. DOI: [10.1016/j.cell.2011.02.013](https://doi.org/10.1016/j.cell.2011.02.013)  
361
- 362 Kivelä, T., Simpson, E. R., Grossniklaus, H. E., Jager, M. J., Singh, A. D., Caminal, J.  
363 M., Pavlick, A. C., Kujala, E., Coupland, S. E., Finger, P. T., 2017. Uveal Melanoma.  
364 AJCC Cancer Staging Manual. 8 ed. Chicago: Springer, 805-817.  
365
- 366 Kujala, E., Mäkitie, T., Kivelä, T., 2003. Very long-term prognosis of patients with  
367 malignant uveal melanoma. Invest Ophthalmol Vis Sci, 4411, 4651-4659. DOI:  
368 [10.1167/iovs.03-0538](https://doi.org/10.1167/iovs.03-0538)  
369
- 370 McLean, I., Foster, W., Zimmerman, L., Gamel, J., 1983. Modifications of  
371 Callender's classification of uveal melanoma at the Armed Forces Institute of  
372 Pathology. Am J Ophthalmol, 96, 502-509. DOI: [10.1016/j.ajo.2018.08.025](https://doi.org/10.1016/j.ajo.2018.08.025)  
373
- 374 Onken, M. D., Ehlers, J. P., Worley, L. A., Makita, J., Yokota, Y., Harbour, J. W.,  
375 2006. Functional gene expression analysis uncovers phenotypic switch in aggressive  
376 uveal melanomas. Cancer res, 669, 4602-4609. DOI: [10.1158/0008-5472.CAN-05-4196](https://doi.org/10.1158/0008-5472.CAN-05-4196)  
377
- 378
- 379 Onken, M. D., Worley, L. A., Char, D. H., Augsburger, J. J., Correa, Z. M.,  
380 Nudleman, E., Aaberg, T. M., Altaweel, M. M., Bardenstein, D. S., Finger, P. T.,  
381 Gallie, B. L., Harocopos, G. J., Hovland, P. G., McGowan, H. D., Milman, T.,  
382 Mruthyunjaya, P., Simpson, E. R., Smith, M. E., Wilson, D. J., Wirostko, W. J.,  
383 Harbour, J. W., 2012. Collaborative Ocular Oncology Group report number 1:  
384 prospective validation of a multi-gene prognostic assay in uveal melanoma.  
385 Ophthalmol, 1198, 1596-1603. DOI: [10.1016/j.ophtha.2012.02.017](https://doi.org/10.1016/j.ophtha.2012.02.017)  
386
- 387 Robertson, A. G., Shih, J., Yau, C., Gibb, E. A., Oba, J., Mungall, K. L., Hess, J. M.,  
388 Uzunangelov, V., Walter, V., Danilova, L., Lichtenberg, T. M., Kucherlapati, M.,  
389 Kimes, P. K., Tang, M., Penson, A., Babur, O., Akbani, R., Bristow, C. A., Hoadley,  
390 K. A., Iype, L., Chang, M. T., Cherniack, A. D., Benz, C., Mills, G. B., Verhaak, R.  
391 G. W., Griewank, K. G., Felau, I., Zenklusen, J. C., Gershenwald, J. E., Schoenfield,

- 392 L., Lazar, A. J., Abdel-Rahman, M. H., Roman-Roman, S., Stern, M.-H., Cebulla, C.  
393 M., Williams, M. D., Jager, M. J., Coupland, S. E., Esmaeli, B., Kandoth, C.,  
394 Woodman, S. E., 2017. Integrative Analysis Identifies Four Molecular and Clinical  
395 Subsets in Uveal Melanoma. *Cancer Cell*, 322, 204-220. DOI:  
396 [10.1016/j.ccell.2017.07.003](https://doi.org/10.1016/j.ccell.2017.07.003)  
397  
398 Seddon, J. M., Polivogianis, L., Hsieh, C.-C., Albert, D. M., Gamel, J. W.,  
399 Gragoudas, E. S., 1987. Death From Uveal Melanoma: Number of Epithelioid Cells  
400 and Inverse SD of Nucleolar Area as Prognostic Factors. *Archives of Ophthalmol*,  
401 1056, 801-806. DOI: [10.1001/archophth.1987.01060060087039](https://doi.org/10.1001/archophth.1987.01060060087039)  
402  
403 See, T. R. O., Stålhammar, G., Phillips, S. S., Grossniklaus, H. E., 2019. BAP1  
404 Immunoreactivity Correlates with Gene Expression Class in Uveal Melanoma. *Ocul*  
405 *Oncol Pathol*, 1-9. DOI:10.1159/000502550)  
406  
407 Singh, N., Bergman, L., Seregard, S., Singh, A. D., 2014. Epidemiologic Aspects, in:  
408 Damato, B. and Singh, A.D. (Eds.) *Clinical Ophthalmic oncology: Uveal tumors*  
409 *Clinical Ophthalmic Oncology*. 2 ed. Berlin, Heidelberg: Springer, pp. 75-87.  
410  
411 Stålhammar, G., Fuentes Martinez, N., Lippert, M., Tobin, N. P., Mølholm, I., Kis, L.,  
412 Rosin, G., Rantalainen, M., Pedersen, L., Bergh, J., Grunkin, M., Hartman, J., 2016.  
413 Digital image analysis outperforms manual biomarker assessment in breast cancer.  
414 *Mod pathol*, 294, 318. DOI: [10.1038/modpathol.2016.34](https://doi.org/10.1038/modpathol.2016.34)  
415  
416 Stålhammar, G., Robertson, S., Wedlund, L., Lippert, M., R antalainen, M., Bergh, J.,  
417 Hartman, J., 2018. Digital image analysis of Ki67 in hot spots is superior to both  
418 manual Ki67 and mitotic counts in breast cancer. *Histopathol*, 726, 974-989. DOI:  
419 [10.1111/his.13452](https://doi.org/10.1111/his.13452)  
420  
421 Stålhammar, G., See, T. R. O., Phillips, S., Seregard, S., Grossniklaus, H. E., 2019a.  
422 Digital Image Analysis of BAP-1 Accurately Predicts Uveal Melanoma Metastasis.  
423 *Translational vis sci & technol*, 6, e11. DOI: [10.1167/tvst.8.3.11](https://doi.org/10.1167/tvst.8.3.11)  
424  
425 Stålhammar, G., See, T. R. O., Phillips, S. S., Grossniklaus, H. E., 2019b. Density of  
426 PAS positive patterns in uveal melanoma: Correlation with vasculogenic mimicry,  
427 gene expression class, BAP-1 expression, macrophage infiltration, and risk for  
428 metastasis. *Mol vis*, 25, 502-516.  
429  
430 Szalai, E., Wells, J. R., Ward, L., Grossniklaus, H. E., 2018. Uveal Melanoma  
431 Nuclear BRCA1-Associated Protein-1 Immunoreactivity Is an Indicator of Metastasis.  
432 *Ophthalmol*, 1252, 203-209. DOI: [10.1016/j.opthta.2017.07.018](https://doi.org/10.1016/j.opthta.2017.07.018)

433

434 **Legends**





435

436 Figure 1. Illustration of cell morphometric measurements. A) Calipers denotes the  
437 largest and smallest diameters of the nucleus and cell. Nucleus eccentricity is a  
438 measure of how much the nucleus deviates from a spherical shape, presented as a  
439 number between 0.00 and 1.00. A completely spherical nucleus has an eccentricity of  
440 0.00, a nucleus with the shape of an elliptical 3D solid would have an eccentricity of  
441 0.5, whereas a 3D conical distribution would have a value of 1.00. Circularity  
442 compares the perimeter of a shape to the area it contains and is calculated by four  
443 times  $\pi$  times the area divided by the perimeter squared. The circularity of a circle is  
444 1.00, and less for less circular objects. The nucleus to cell area ratio is the area of the  
445 nucleus divided with the area of the entire cell. B) Example of the morphologic  
446 appearance of a tumor mainly composed of epitheloid cells. C) In this tumor, a  
447 circular 0.5 mm-diameter region of interest (corresponding to the field of view in a  
448 light microscope with a 400 $\times$  objective) has been identified. Within the region of  
449 interest, each cell is automatically analyzed for the level of nBAP-1 expression and 12  
450 morphometric variables. D) The results of the measurements can be presented as  
451 frequency distributions. In this example, the mean nucleus to cell area ratio of the  
452 cells measured in the region of interest was 0.32 (dotted line). E) and F) A tumor  
453 mainly composed of spindle-like cells is shown for comparison. G) This tumor had a

454 slightly lower mean nucleus to cell area ratio of 0.28. Cell illustration by  
 455 iStock.com/Vitalii Dumma, East Ukraine Volodymyr Dahl National University Scale  
 456 bars: 100  $\mu$ m.

|                                             | Training cohort | Validation cohort |
|---------------------------------------------|-----------------|-------------------|
| <b>n =</b>                                  | 27              | 80                |
| <b>Mean age at diagnosis, years (SD)</b>    | 66 (15)         | 62 (14)           |
| <b>Sex, n (%)</b>                           |                 |                   |
| Female                                      | 15 (56)         | 35 (44)           |
| Male                                        | 12 (44)         | 45 (56)           |
| <b>Primary tumor location, n (%)</b>        |                 |                   |
| Choroid                                     | 25 (93)         | 75 (94)           |
| Ciliary body                                | 2 (7)           | 5 (6)             |
| Iris                                        | 0 (0)           | 0 (0)             |
| <b>Cell type, n (%)</b>                     |                 |                   |
| Spindle                                     | 5 (19)          | 28 (35)           |
| Epitheloid                                  | 4 (15)          | 12 (15)           |
| Mixed                                       | 18 (67)         | 39 (49)           |
| N/a                                         |                 | 1 (1)             |
| <b>Mean tumor thickness, mm (SD)</b>        | 8.6 (3.7)       | N/a               |
| <b>Mean tumor diameter, mm (SD)</b>         | 15.8 (4.8)      | N/a               |
| <b>Previous brachytherapy or TTT, n (%)</b> |                 |                   |
| No                                          | 27 (100)        | 80 (100)          |
| Yes                                         | 0 (0)           | 0 (0)             |
| <b>AJCC T-category, n (%)</b>               |                 |                   |
| 1                                           | 0 (0)           | 0 (0)             |
| 2                                           | 7 (26)          | 14 (18)           |
| 3                                           | 14 (52)         | 33 (41)           |
| 4                                           | 6 (22)          | 33 (41)           |
| <b>Gene expression class, n (%)</b>         |                 |                   |
| 1a                                          | 9 (33)          | N/a               |
| 1b                                          | 6 (22)          | N/a               |
| 2                                           | 12 (44)         | N/a               |
| <b>DIA nBAP-1 classification, n (%)</b>     |                 |                   |

|                                                |         |         |
|------------------------------------------------|---------|---------|
| High                                           | 13 (48) | N/a     |
| Low                                            | 14 (52) | N/a     |
| <b>Follow-up months, mean (SD)<sup>§</sup></b> | 47 (76) | 28 (19) |

457 Table 1. Characteristics of patients and tumors included in this study. SD, standard  
458 deviation. N/a, not available. TTT, Transpupillary thermotherapy.

459

|                            | <b>Interobserver concordance (%)</b> | <b>Cohen's <math>\kappa</math></b> |
|----------------------------|--------------------------------------|------------------------------------|
| Nucleus area               | 85                                   | 0.70                               |
| Nucleus perimeter          | 85                                   | 0.70                               |
| Nucleus circularity        | 96                                   | 0.93                               |
| Nucleus caliper, max       | 85                                   | 0.70                               |
| Nucleus caliper, min       | 89                                   | 0.78                               |
| Nucleus eccentricity       | 96                                   | 0.93                               |
| Cell area                  | 85                                   | 0.70                               |
| Cell perimeter             | 85                                   | 0.70                               |
| Cell circularity           | 93                                   | 0.85                               |
| Cell caliper, max          | 85                                   | 0.70                               |
| Cell caliper, min          | 85                                   | 0.70                               |
| Nucleus to cell area ratio | 96                                   | 0.93                               |

460 Table 2. Interobserver concordance and Cohen's kappa statistics in classification of  
461 each morphometric variable as above or below the median value.

462

|                                         | <b>nBAP-1 high</b> | <b>nBAP-1 low</b> | <b>P</b> |
|-----------------------------------------|--------------------|-------------------|----------|
| Nucleus area, $\mu\text{m}^2$ (SD)      | 24.31 (4.38)       | 28.34 (3.40)      | 0.013    |
| Nucleus perimeter, $\mu\text{m}$ (SD)   | 19.61 (1.78)       | 21.37 (1.28)      | 0.007    |
| Nucleus circularity                     | 0.76 (0.04)        | 0.75 (0.04)       | 0.406    |
| Nucleus caliper, max $\mu\text{m}$ (SD) | 7.52 (0.65)        | 8.21 (0.58)       | 0.007    |

|                                         |               |               |       |
|-----------------------------------------|---------------|---------------|-------|
| Nucleus caliper, min $\mu\text{m}$ (SD) | 4.43 (0.59)   | 4.67 (0.36)   | 0.202 |
| Nucleus eccentricity (SD)               | 0.76 (0.03)   | 0.77 (0.04)   | 0.524 |
| Cell area, $\mu\text{m}^2$ (SD)         | 88.50 (15.10) | 94.58 (12.42) | 0.263 |
| Cell perimeter, $\mu\text{m}$ (SD)      | 37.05 (3.26)  | 38.33 (2.53)  | 0.263 |
| Cell circularity                        | 0.77 (0.01)   | 0.77 (0.01)   | 0.704 |
| Cell caliper, max $\mu\text{m}$ (SD)    | 13.62 (1.22)  | 14.09 (0.97)  | 0.270 |
| Cell caliper, min $\mu\text{m}$ (SD)    | 9.00 (0.79)   | 9.29 (0.59)   | 0.298 |
| Nucleus to cell area ratio              | 0.28 (0.03)   | 0.30 (0.02)   | 0.031 |

463 Table 3a.

464 Average values and *P* defined by one-way ANOVA with Bonferroni correction of cell  
 465 morphometric variables in tumors of high versus low nBAP-1 expression. SD,  
 466 standard deviation.

467

|                                         | Gene expression class<br>1a or 1b | Gene expression<br>class 2 | <i>P</i> |
|-----------------------------------------|-----------------------------------|----------------------------|----------|
| Nucleus area, $\mu\text{m}^2$ (SD)      | 26.13 (3.93)                      | 28.52 (3.66)               | 0.149    |
| Nucleus perimeter, $\mu\text{m}$ (SD)   | 20.28 (3.91)                      | 21.46 (1.42)               | 0.084    |
| Nucleus circularity                     | 0.77 (0.04)                       | 0.75 (0.04)                | 0.253    |
| Nucleus caliper, max $\mu\text{m}$ (SD) | 7.75 (0.57)                       | 8.25 (0.65)                | 0.065    |
| Nucleus caliper, min $\mu\text{m}$ (SD) | 4.61 (0.58)                       | 4.67 (0.38)                | 0.769    |
| Nucleus eccentricity (SD)               | 0.76 (0.03)                       | 0.77 (0.04)                | 0.378    |
| Cell area, $\mu\text{m}^2$ (SD)         | 94.32 (11.05)                     | 94.47 (13.60)              | 0.977    |
| Cell perimeter, $\mu\text{m}$ (SD)      | 38.32 (2.25)                      | 38.29 (2.80)               | 0.984    |
| Cell circularity                        | 0.77 (0.01)                       | 0.77 (0.01)                | 0.713    |
| Cell caliper, max $\mu\text{m}$ (SD)    | 14.07 (0.79)                      | 14.09 (1.10)               | 0.959    |
| Cell caliper, min $\mu\text{m}$ (SD)    | 9.33 (0.60)                       | 9.27 (0.62)                | 0.807    |
| Nucleus to cell area ratio              | 0.28 (0.03)                       | 0.30 (0.02)                | 0.049    |

468 Table 3b.

469 Average values and  $P$  defined by one-way ANOVA with Bonferroni correction of

470 cell morphometric variables in tumors of gene expression class 1a or 1b versus 2. SD,

471 standard deviation.

472



473

474 Figure 2.

475 Receiver operating characteristics (ROC) of the mean nucleus area, mean nucleus

476 perimeter, mean nucleus max caliper and mean nucleus to cell area ratio in the

477 training cohort ( $n=27$ ), with equal emphasis on sensitivity and specificity for the

478 development of metastasis. Mean nucleus area (blue line) achieved an area under the  
 479 curve (AUC) of 0.54 (sensitivity 67 %, specificity 50 %, p=0.76) at threshold 28  $\mu\text{m}^2$ ;  
 480 Mean nucleus perimeter (red line) achieved an AUC of 0.58 (sensitivity 67 %, specificity 56 %, p=0.50) at threshold 22  $\mu\text{m}$ ; Mean nucleus max caliper (green line)  
 481 achieved an AUC of 0.61 (sensitivity 56 %, specificity 67 %, p=0.38) at threshold 8.2  
 482  $\mu\text{m}$ ; and mean nucleus to cell area ratio (orange line) achieved an AUC of 0.69  
 483 (sensitivity 56 %, specificity 67 %, p asymptotic significance p=0.12) at threshold  
 484 0.32.  
 485  
 486

|                                              | <b>Regression coefficient, <math>\beta</math> (SE)</b> | <b>Wald statistic</b> | <b>P</b> | <b>Hazard coefficient, Exp(b) (95% CI)</b> |
|----------------------------------------------|--------------------------------------------------------|-----------------------|----------|--------------------------------------------|
| <b>Univariate Cox proportional hazards</b>   |                                                        |                       |          |                                            |
| Nucleus area > 28 $\mu\text{m}^2$            | 0.5 (0.4)                                              | 1.3                   | 0.256    | 1.6 (0.7–3.8)                              |
| Nucleus perimeter > 22 $\mu\text{m}$         | 1.3 (0.5)                                              | 6.9                   | 0.009    | 3.5 (1.4–9.0)                              |
| Nucleus caliper, max > 8.2 $\mu\text{m}$     | 1.0 (0.4)                                              | 5.0                   | 0.025    | 2.7 (1.1–6.5)                              |
| Nucleus to cell area ratio > 0.32            | 0.9 (0.5)                                              | 4.3                   | 0.039    | 2.6 (1.0–6.3)                              |
| <b>Multivariate Cox proportional hazards</b> |                                                        |                       |          |                                            |
| Nucleus area > 28 $\mu\text{m}^2$            | -0.8 (0.6)                                             | 1.7                   | 0.188    | 0.5 (0.1–1.5)                              |
| Nucleus perimeter > 22 $\mu\text{m}$         | 2.1 (0.9)                                              | 5.6                   | 0.018    | 7.8 (1.4–42.4)                             |
| Nucleus caliper, max > 8.2 $\mu\text{m}$     | -0.4 (0.8)                                             | 0.3                   | 0.608    | 0.6 (0.1–3.4)                              |
| Nucleus to cell area ratio > 0.32            | 1.0 (0.5)                                              | 4.2                   | 0.041    | 2.8 (1.0–7.5)                              |

487 Table 4.  
 488 Univariate and multivariate Cox Proportional Hazards analysis of the association  
 489 between metastasis-free survival and cell morphometric variables. SE, standard error.  
 490



491

492 Figure 3.

493 Kaplan-Meier curves, cumulative overall survival in the validation cohort ( $n=80$ ). A)

494 Patients with tumors with mean nucleus area < 28  $\mu\text{m}^2$  (blue) versus > 28  $\mu\text{m}^2$  (red,

495 Log-Rank  $p=0.266$ ). B) Patients with tumors with mean nucleus perimeter < 22  $\mu\text{m}$

496 (blue) versus > 22  $\mu\text{m}^2$  (red, Log-Rank  $p=0.031$ ). C) Patients with tumors with mean

497 nucleus max caliper < 8.2  $\mu\text{m}$  (blue) versus > 8.2  $\mu\text{m}^2$  (red, Log-Rank  $p=0.029$ ). D)

498 Patients with tumors with mean nucleus to cell area ratio < 0.32 (blue) versus > 0.32

499 (red, Log-Rank  $p=0.041$ ). The thresholds were established in the training cohort.









|                                                | Training cohort | Validation cohort |
|------------------------------------------------|-----------------|-------------------|
| <b><i>n</i> =</b>                              | 27              | 80                |
| <b>Mean age at diagnosis, years (SD)</b>       | 66 (15)         | 62 (14)           |
| <b>Sex, n (%)</b>                              |                 |                   |
| Female                                         | 15 (56)         | 35 (44)           |
| Male                                           | 12 (44)         | 45 (56)           |
| <b>Primary tumor location, n (%)</b>           |                 |                   |
| Choroid                                        | 25 (93)         | 75 (94)           |
| Ciliary body                                   | 2 (7)           | 5 (6)             |
| Iris                                           | 0 (0)           | 0 (0)             |
| <b>Cell type, n (%)</b>                        |                 |                   |
| Spindle                                        | 5 (19)          | 28 (35)           |
| Epitheloid                                     | 4 (15)          | 12 (15)           |
| Mixed                                          | 18 (67)         | 39 (49)           |
| N/a                                            |                 | 1 (1)             |
| <b>Mean tumor thickness, mm (SD)</b>           | 8.6 (3.7)       | N/a               |
| <b>Mean tumor diameter, mm (SD)</b>            | 15.8 (4.8)      | N/a               |
| <b>Previous brachytherapy or TTT, n (%)</b>    |                 |                   |
| No                                             | 27 (100)        | 80 (100)          |
| Yes                                            | 0 (0)           | 0 (0)             |
| <b>AJCC T-category, n (%)</b>                  |                 |                   |
| 1                                              | 0 (0)           | 0 (0)             |
| 2                                              | 7 (26)          | 14 (18)           |
| 3                                              | 14 (52)         | 33 (41)           |
| 4                                              | 6 (22)          | 33 (41)           |
| <b>Gene expression class, n (%)</b>            |                 |                   |
| 1a                                             | 9 (33)          | N/a               |
| 1b                                             | 6 (22)          | N/a               |
| 2                                              | 12 (44)         | N/a               |
| <b>DIA nBAP-1 classification, n (%)</b>        |                 |                   |
| High                                           | 13 (48)         | N/a               |
| Low                                            | 14 (52)         | N/a               |
| <b>Follow-up months, mean (SD)<sup>§</sup></b> | 47 (76)         | 28 (19)           |

|                            | <b>Interobserver concordance (%)</b> | <b>Cohen's <math>\kappa</math></b> |
|----------------------------|--------------------------------------|------------------------------------|
| Nucleus area               | 85                                   | 0.70                               |
| Nucleus perimeter          | 85                                   | 0.70                               |
| Nucleus circularity        | 96                                   | 0.93                               |
| Nucleus caliper, max       | 85                                   | 0.70                               |
| Nucleus caliper, min       | 89                                   | 0.78                               |
| Nucleus eccentricity       | 96                                   | 0.93                               |
| Cell area                  | 85                                   | 0.70                               |
| Cell perimeter             | 85                                   | 0.70                               |
| Cell circularity           | 93                                   | 0.85                               |
| Cell caliper, max          | 85                                   | 0.70                               |
| Cell caliper, min          | 85                                   | 0.70                               |
| Nucleus to cell area ratio | 96                                   | 0.93                               |

|                                         | <b>nBAP-1 high</b> | <b>nBAP-1 low</b> | <b>P</b> |
|-----------------------------------------|--------------------|-------------------|----------|
| Nucleus area, $\mu\text{m}^2$ (SD)      | 24.31 (4.38)       | 28.34 (3.40)      | 0.013    |
| Nucleus perimeter, $\mu\text{m}$ (SD)   | 19.61 (1.78)       | 21.37 (1.28)      | 0.007    |
| Nucleus circularity                     | 0.76 (0.04)        | 0.75 (0.04)       | 0.406    |
| Nucleus caliper, max $\mu\text{m}$ (SD) | 7.52 (0.65)        | 8.21 (0.58)       | 0.007    |
| Nucleus caliper, min $\mu\text{m}$ (SD) | 4.43 (0.59)        | 4.67 (0.36)       | 0.202    |
| Nucleus eccentricity (SD)               | 0.76 (0.03)        | 0.77 (0.04)       | 0.524    |
| Cell area, $\mu\text{m}^2$ (SD)         | 88.50 (15.10)      | 94.58 (12.42)     | 0.263    |
| Cell perimeter, $\mu\text{m}$ (SD)      | 37.05 (3.26)       | 38.33 (2.53)      | 0.263    |
| Cell circularity                        | 0.77 (0.01)        | 0.77 (0.01)       | 0.704    |
| Cell caliper, max $\mu\text{m}$ (SD)    | 13.62 (1.22)       | 14.09 (0.97)      | 0.270    |
| Cell caliper, min $\mu\text{m}$ (SD)    | 9.00 (0.79)        | 9.29 (0.59)       | 0.298    |
| Nucleus to cell area ratio              | 0.28 (0.03)        | 0.30 (0.02)       | 0.031    |

|                                         | <b>Gene expression class 1a<br/>or 1b</b> | <b>Gene expression class 2</b> | <b>P</b> |
|-----------------------------------------|-------------------------------------------|--------------------------------|----------|
| Nucleus area, $\mu\text{m}^2$ (SD)      | 26.13 (3.93)                              | 28.52 (3.66)                   | 0.149    |
| Nucleus perimeter, $\mu\text{m}$ (SD)   | 20.28 (3.91)                              | 21.46 (1.42)                   | 0.084    |
| Nucleus circularity                     | 0.77 (0.04)                               | 0.75 (0.04)                    | 0.253    |
| Nucleus caliper, max $\mu\text{m}$ (SD) | 7.75 (0.57)                               | 8.25 (0.65)                    | 0.065    |
| Nucleus caliper, min $\mu\text{m}$ (SD) | 4.61 (0.58)                               | 4.67 (0.38)                    | 0.769    |
| Nucleus eccentricity (SD)               | 0.76 (0.03)                               | 0.77 (0.04)                    | 0.378    |
| Cell area, $\mu\text{m}^2$ (SD)         | 94.32 (11.05)                             | 94.47 (13.60)                  | 0.977    |
| Cell perimeter, $\mu\text{m}$ (SD)      | 38.32 (2.25)                              | 38.29 (2.80)                   | 0.984    |
| Cell circularity                        | 0.77 (0.01)                               | 0.77 (0.01)                    | 0.713    |
| Cell caliper, max $\mu\text{m}$ (SD)    | 14.07 (0.79)                              | 14.09 (1.10)                   | 0.959    |
| Cell caliper, min $\mu\text{m}$ (SD)    | 9.33 (0.60)                               | 9.27 (0.62)                    | 0.807    |
| Nucleus to cell area ratio              | 0.28 (0.03)                               | 0.30 (0.02)                    | 0.049    |

|                                              | Regression coefficient, $\beta$ (SE) | Wald statistic | <i>P</i> | Hazard coefficient, Exp( <i>b</i> ) (95% CI) |
|----------------------------------------------|--------------------------------------|----------------|----------|----------------------------------------------|
| <b>Univariate Cox proportional hazards</b>   |                                      |                |          |                                              |
| Nucleus area > 28 $\mu\text{m}^2$            | 0.5 (0.4)                            | 1.3            | 0.256    | 1.6 (0.7–3.8)                                |
| Nucleus perimeter > 22 $\mu\text{m}$         | 1.3 (0.5)                            | 6.9            | 0.009    | 3.5 (1.4–9.0)                                |
| Nucleus caliper, max > 8.2 $\mu\text{m}$     | 1.0 (0.4)                            | 5.0            | 0.025    | 2.7 (1.1–6.5)                                |
| Nucleus to cell area ratio > 0.32            | 0.9 (0.5)                            | 4.3            | 0.039    | 2.6 (1.0–6.3)                                |
| <b>Multivariate Cox proportional hazards</b> |                                      |                |          |                                              |
| Nucleus area > 28 $\mu\text{m}^2$            | -0.8 (0.6)                           | 1.7            | 0.188    | 0.5 (0.1–1.5)                                |
| Nucleus perimeter > 22 $\mu\text{m}$         | 2.1 (0.9)                            | 5.6            | 0.018    | 7.8 (1.4–42.4)                               |
| Nucleus caliper, max > 8.2 $\mu\text{m}$     | -0.4 (0.8)                           | 0.3            | 0.608    | 0.6 (0.1–3.4)                                |
| Nucleus to cell area ratio > 0.32            | 1.0 (0.5)                            | 4.2            | 0.041    | 2.8 (1.0–7.5)                                |
